# Supplementary material for: Comparative Antimicrobial Activity of Silver Nanoparticles Obtained by Wet Chemical Reduction and Solvothermal Methods
Source: MDPI journal article supplement (doi:10.3390/ijms23115982), 2022-05-26
Supplement: s1 [file s1]

# Comparative antimicrobial activity of silver nanoparticles obtained by wet chemical reduction and solvothermal methods

Liliana Marinescu<sup>1</sup>, Denisa Ficai<sup>1</sup>, Anton Ficai<sup>1,3</sup>, Ovidiu Oprea<sup>1</sup>, Adrian Ionut Nicoara<sup>1</sup>, Bogdan Stefan Vasile<sup>1</sup>, Laura Boanta<sup>2</sup>, Alexandru Marin<sup>2</sup>, Ecaterina Andronescu<sup>1,3,\*</sup>, Alina-Maria Holban<sup>4</sup>

<sup>1</sup> POLITEHNICA University of Bucharest, Faculty of Applied Chemistry and Material Science, Gh Polizu street 1-7, 011061 Bucharest, Romania (\*ecaterina.andronescu@upb.ro)

<sup>2</sup> POLITEHNICA University of Bucharest, Faculty of Power Engineering, Department of Hydraulics, Hydraulic Machinery and Environmental Engineering, 313 Splaiul Independentei, District 6, 060042-Bucharest, Romania

<sup>3</sup> Academy of Romanian Scientists, Ilfov st 3, 050054 Bucharest, Romania

<sup>4</sup> University of Bucharest, Faculty of Biology, Microbiology Immunology Department, 1-3 Portocalelor Lane, District 5, 77206 Bucharest, Romania

## Supplementary materials

Table S1. Intensity values of peaks for samples encoded RT obtained at the room temperature.

| Batch   | RT1 |                |                |                |                |                |                |                |                |
|---------|-----|----------------|----------------|----------------|----------------|----------------|----------------|----------------|----------------|
| Cycle01 | nm  | 332            | 638            | 650            | 1034           | 1059           | 1068           | 1074           | 1087           |
| Peaks   | A   | <b>0.22699</b> | <b>0.76556</b> | <b>0.76558</b> | <b>0.03492</b> | <b>0.04458</b> | <b>0.04748</b> | <b>0.05371</b> | <b>0.08348</b> |
| Batch   | RT2 |                |                |                |                |                |                |                |                |
| Cycle01 | nm  | 335            | 719            | 727            | 733            | 744            | 1058           | 1068           | 1087           |
| Peaks   | A   | <b>0.2312</b>  | <b>0.74844</b> | <b>0.74935</b> | <b>0.74974</b> | <b>0.74845</b> | <b>0.14654</b> | <b>0.14244</b> | <b>0.15822</b> |
| Batch   | RT3 |                |                |                |                |                |                |                |                |
| Cycle01 | nm  | 223            | 333            | 459            | 491            | 496            | 500            | 505            | 659            |
| Peaks   | A   | <b>4.31756</b> | <b>0.96292</b> | <b>0.94999</b> | <b>0.90647</b> | <b>0.90097</b> | <b>0.8989</b>  | <b>0.89968</b> | <b>1.65273</b> |

Table S2. Intensity values of peaks for samples encoded HT obtained by solvothermal synthesis

| Batch   | HT1              |               |               |               |               |               |               |               |               |
|---------|------------------|---------------|---------------|---------------|---------------|---------------|---------------|---------------|---------------|
| Cycle01 | nm               | 407           | 560           | 565           | 573           | 580           | 584           | 587           | 589           |
| Peaks   | A                | <b>2.2017</b> | <b>0.0805</b> | <b>0.075</b>  | <b>0.0674</b> | <b>0.062</b>  | <b>0.0581</b> | <b>0.0561</b> | <b>0.0556</b> |
| Batch   | S2a dil 10%; 15% |               |               |               |               |               |               |               |               |
| Batch   | HT2              |               |               |               |               |               |               |               |               |
| Cycle01 | nm               | 364           | 367           | 437           | 440           | 444           | 448           | 453           | 457           |
| Peaks   | A                | <b>0.1331</b> | <b>0.1267</b> | <b>0.0364</b> | <b>0.034</b>  | <b>0.032</b>  | <b>0.0292</b> | <b>0.0272</b> | <b>0.0258</b> |
| Batch   | HT3              |               |               |               |               |               |               |               |               |
| Cycle01 | nm               | 481           | 490           | 493           | 496           | 499           | 506           | 511           | 515           |
| Peaks   | A                | <b>0.0444</b> | <b>0.0399</b> | <b>0.0384</b> | <b>0.0374</b> | <b>0.0352</b> | <b>0.0326</b> | <b>0.0306</b> | <b>0.0295</b> |
| Batch   | HT4              |               |               |               |               |               |               |               |               |
| Cycle01 | nm               | 403           | 707           | 710           | 719           | 1075          | 1083          | 1087          | 1096          |
| Peaks   | A                | <b>3.0092</b> | <b>0.0504</b> | <b>0.0487</b> | <b>0.0448</b> | <b>0.0474</b> | <b>0.0638</b> | <b>0.0859</b> | <b>0.1256</b> |
